# Supplementary material for: Impact of Infection with Flavobacterium psychrophilum and Antimicrobial Treatment on the Intestinal Microbiota of Rainbow Trout
Source: MDPI journal article supplement (doi:10.3390/pathogens12030454), 2023-03-14
Supplement: s1 [file s1]

## Supplemental Material

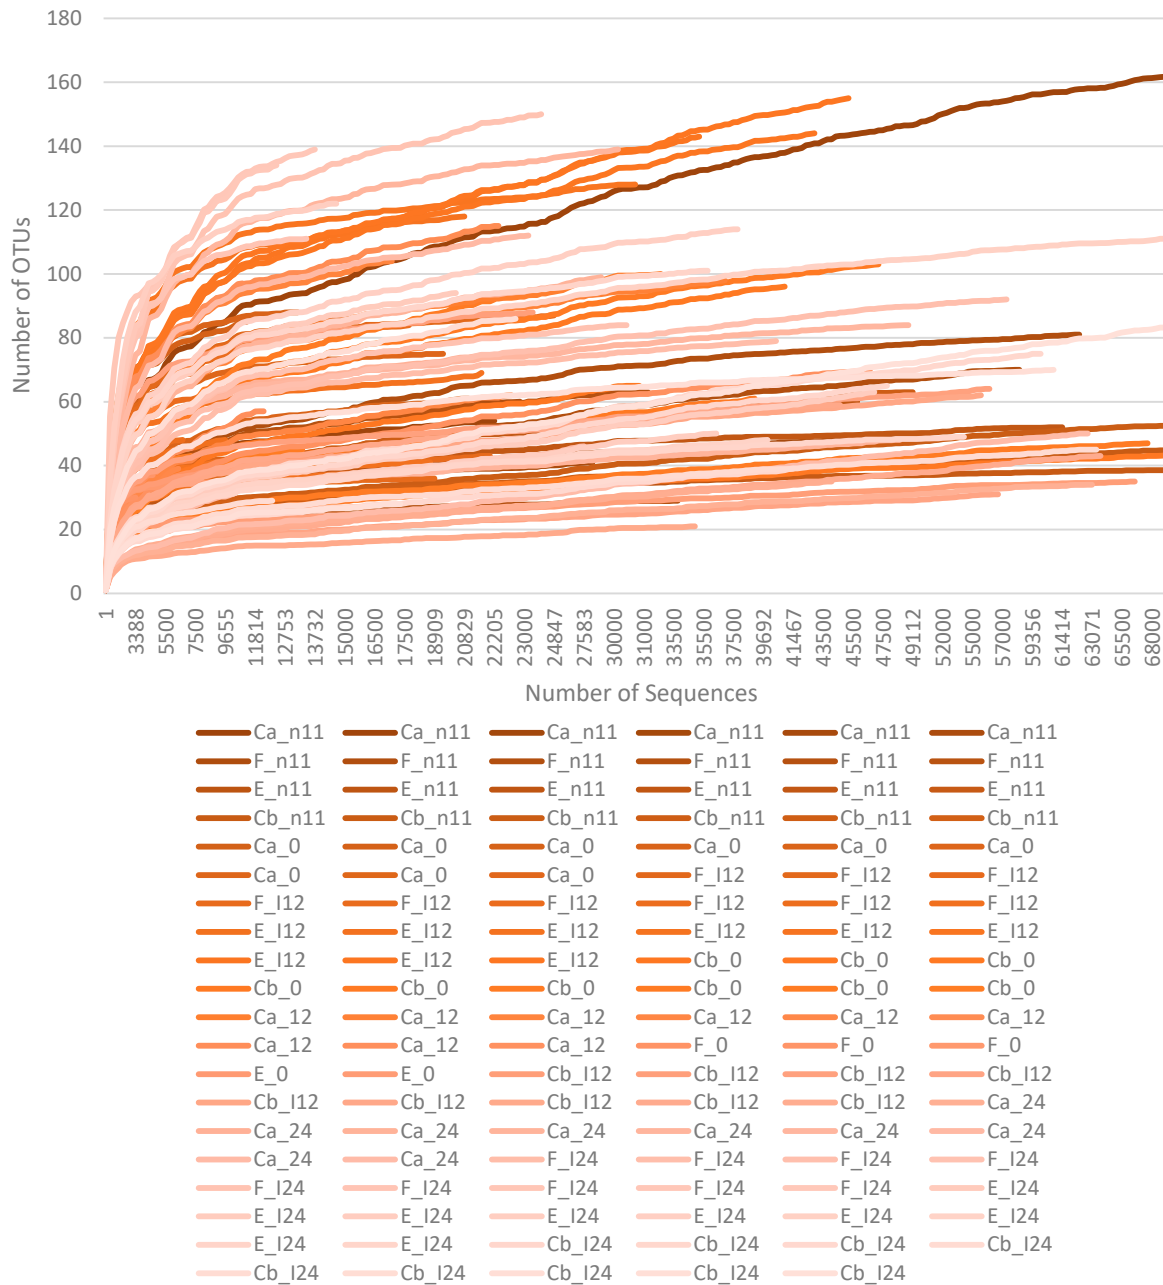

**Figure S1.** Rarefaction curve of each 16S sample from the intestinal content of rainbow trout.

(a)

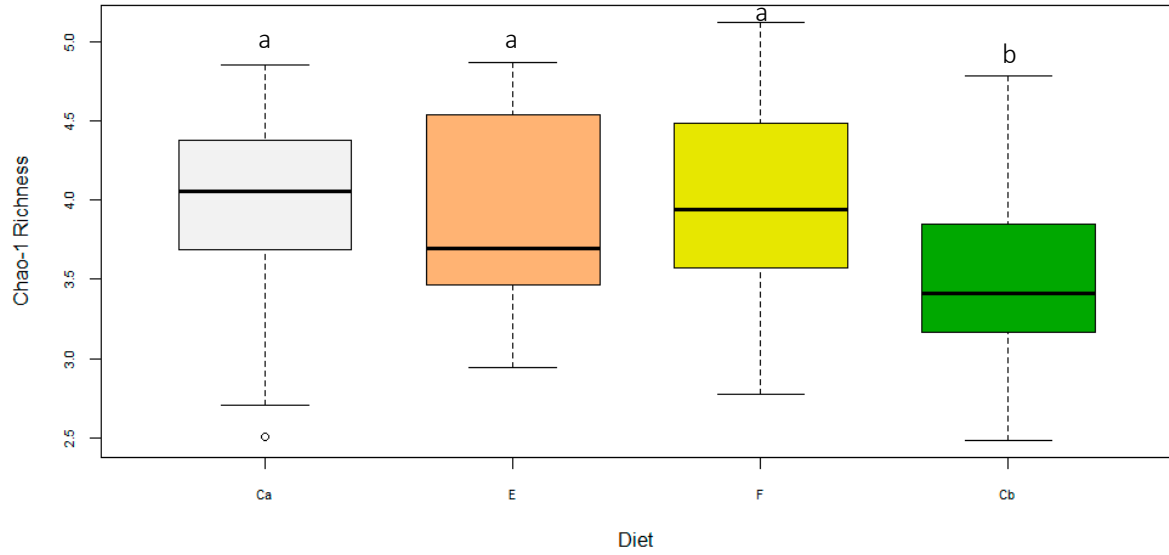

(b)

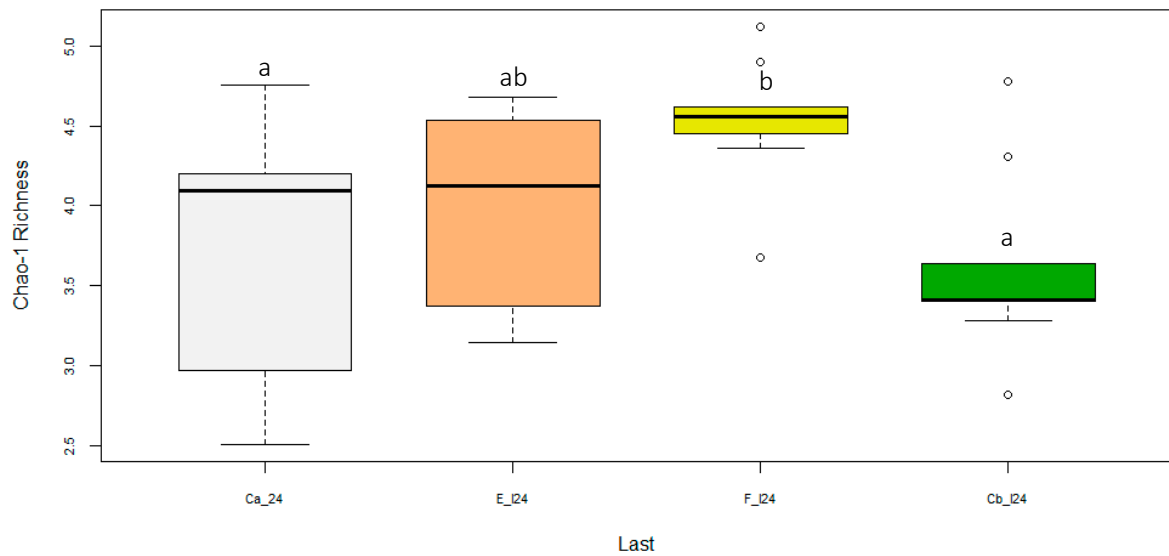

**Figure S2.** Alpha diversities of OTUs (mean  $\pm$  SEM) in the intestine of rainbow trout for each diet (n = 9) based Chao-1 Richness at (a) pooled over four time points, and (b) D24 p.i. (last time point). Treatments included control+uninfected (Ca), erythromycin+infected (E), florfenicol+infected (F) and control+infected (Cb). Differing letters indicate significant difference (p < 0.05).
